# Supplementary material for: Alterations of peripheral nerve excitability in an experimental autoimmune encephalomyelitis mouse model for multiple sclerosis
Source: PubMed Central journal article supplement (PMC7487851; doi:10.1186/s12974-020-01936-9), 2020-09-07
Supplement: 12974_2020_1936_MOESM1_ESM.pdf [file 12974_2020_1936_MOESM1_ESM.pdf]

### Supplementary Material

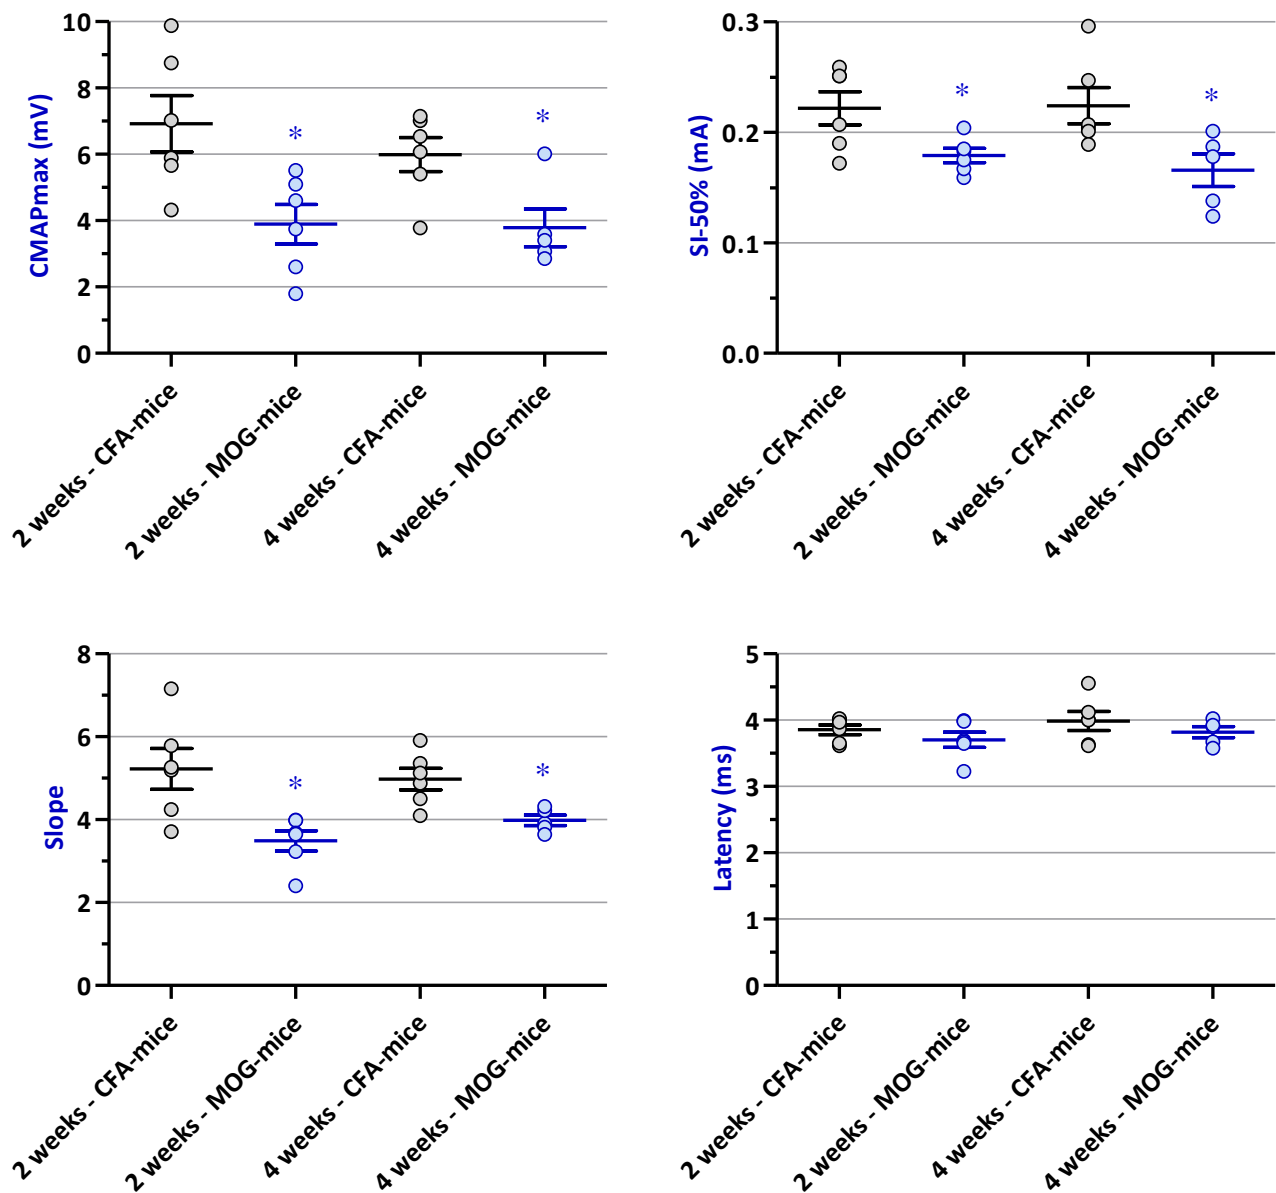

**SUPPLEMENTARY FIGURE 1.** Maximal CMAP amplitude (CMAPmax) recorded from the tail muscle, stimulation intensity necessary to generate a CMAP with an amplitude equal to 50% of its maximum value (SI-50%), slope of the stimulus-response curve (Slope) and time between the stimulus onset and the first peak amplitude of CMAP (Latency) in EAE (MOG) mice, compared to control (CFA) animals, 2 (n = 6) and 4 (n = 5-6) weeks after immunization. \* : P ≤ 0.039.

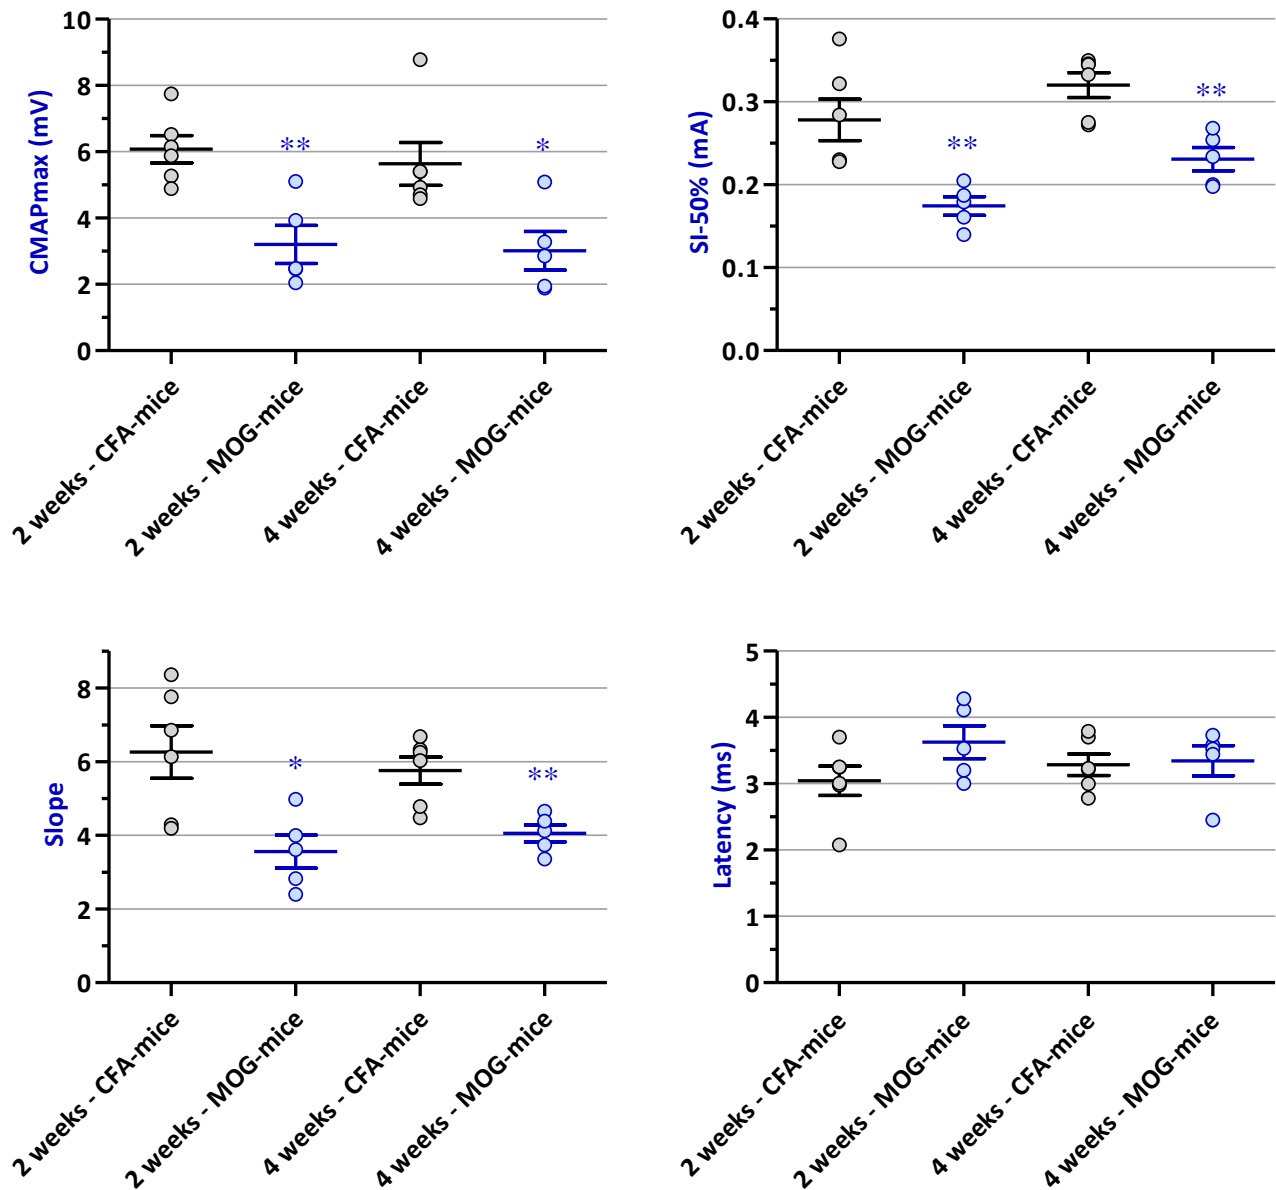

**SUPPLEMENTARY FIGURE 2.** Maximal CMAP amplitude (CMAPmax) recorded from the plantar muscle, stimulation intensity necessary to generate a CMAP with an amplitude equal to 50% of its maximum value (SI-50%), slope of the stimulus-response curve (Slope) and time between the stimulus onset and the first peak amplitude of CMAP (Latency) in EAE (MOG) mice, compared to control (CFA) animals, 2 (n = 5-6) and 4 (n = 5-6) weeks after immunization. \* :  $P \leq 0.048$  and \*\* :  $P \leq 0.007$ .
